# Supplementary figures and images for: Europe-wide reduction in primary productivity caused by the heat and drought in 2003
Source: Springer Nature journal article supplement (doi:10.1038/nature03972), 2005-09-01

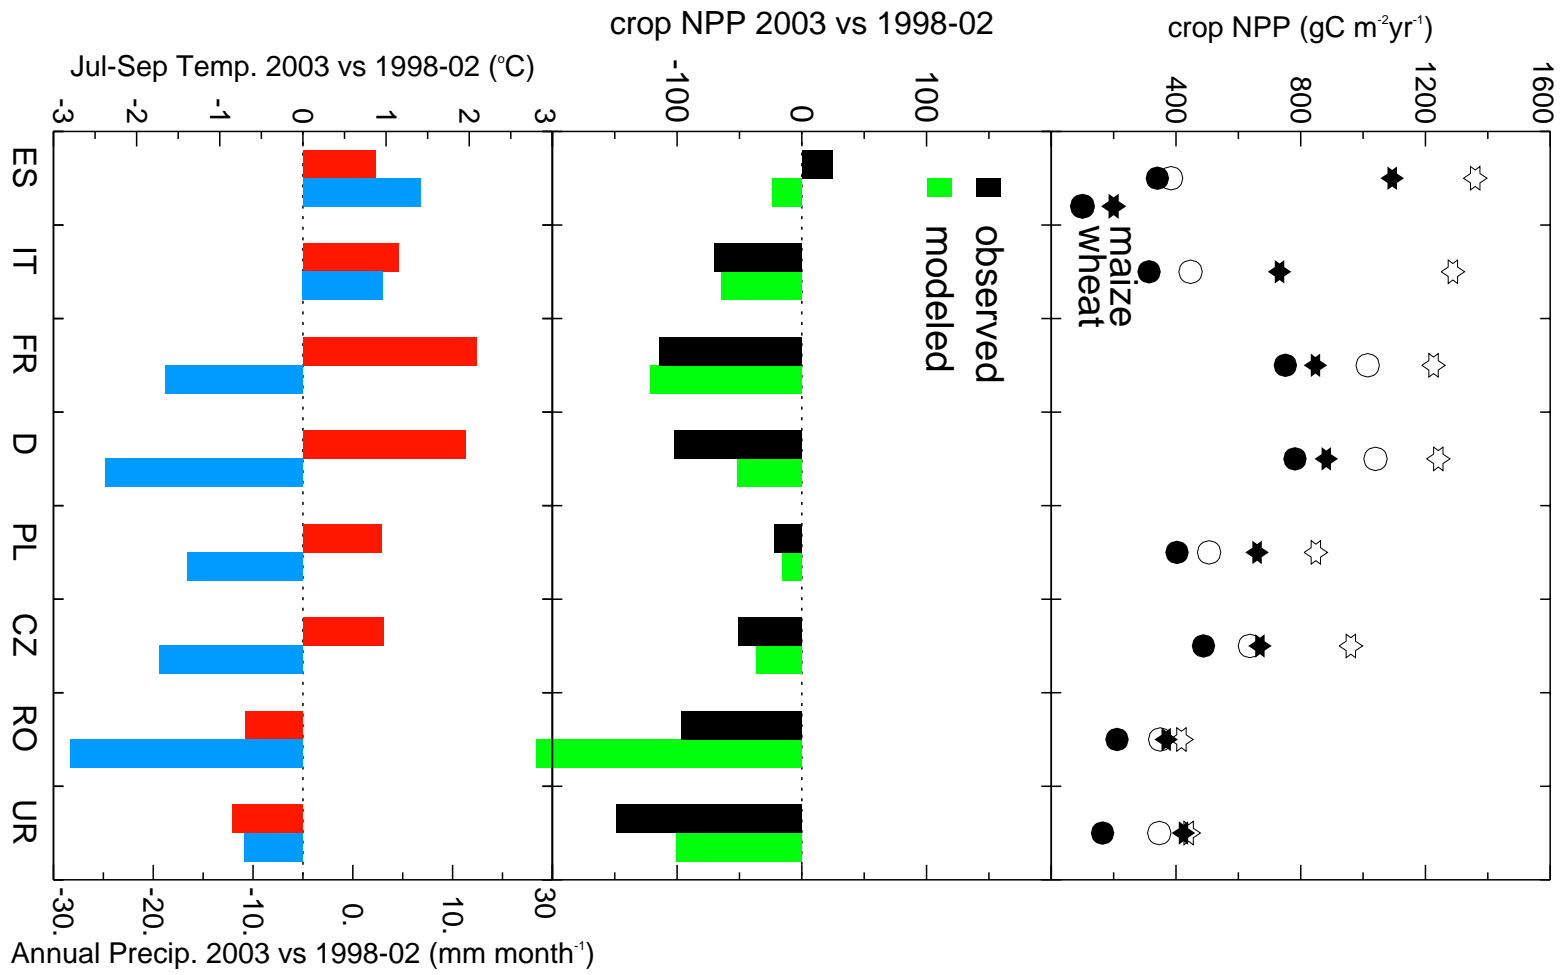

Supplement: nature03972-s2.pdf [file nature03972-s2.pdf]
